# Supplementary material for: Serum Metabolomic Analysis Suggests Impairment of Myocardial Energy Production in Takotsubo Syndrome
Source: MDPI journal article supplement (doi:10.3390/metabo11070439), 2021-07-03
Supplement: s1 [file s1]

Supplemental materials for:

## **Functional domains and evolutionary history of the PMEL and GPNMB family proteins**

Paul W. Chrystal<sup>1,2,\*</sup>, Tim Footz<sup>1,\*</sup>, Elizabeth D. Hodges<sup>2</sup>, Justin A. Jensen<sup>2</sup>,  
Michael A. Walter<sup>1,4</sup>, W. Ted Allison<sup>1,2,3,4</sup>

<sup>1</sup> Department of Medical Genetics, University of Alberta, Edmonton AB, T6G 2R3, CANADA;

<sup>2</sup> Department of Biological Sciences, University of Alberta, Edmonton AB, T7Y 1C4, CANADA;

<sup>3</sup> Centre for Prions & Protein Folding Disease, University of Alberta, Edmonton AB, T6G 2M8, CANADA

<sup>4</sup> Correspondence to WTA (ted.allison@ualberta.ca); MAW (mwalter@ualberta.ca)

\* Co-first authors.

Consisting of:

- Six Supplemental Tables, and
- Six Supplemental Figures

**Table S1.** Percentage sequence identity of human PTHR11861 members at the cDNA level.

| <b><i>PKAT family cDNA alignment</i></b> |                |              |             |
|------------------------------------------|----------------|--------------|-------------|
|                                          | <b>TMEM130</b> | <b>GPNMB</b> | <b>PMEL</b> |
| <b>TMEM130</b>                           | 100            | -            | -           |
| <b>GPNMB</b>                             | 32.476         | 100          | -           |
| <b>PMEL</b>                              | 38.713         | 33.202       | 100         |

**Table S2.** Percentage sequence identity of human PTHR11861 members at the protein level.

| <b><i>PKAT family protein alignment</i></b> |                |              |             |
|---------------------------------------------|----------------|--------------|-------------|
|                                             | <b>TMEM130</b> | <b>GPNMB</b> | <b>PMEL</b> |
| <b>TMEM130</b>                              | 100            | -            | -           |
| <b>GPNMB</b>                                | 17.327         | 100          | -           |
| <b>PMEL</b>                                 | 13.663         | 24.929       | 100         |

**Table S3.** Functional domains predicted in human TMEM130 (ENST00000416379.6), GPNMB (ENST00000647578.1) and PMEL (ENST00000548493.5) by InterPro server.

| Human TMEM130                      |       |     |        | TMEM130-203                     | ENST00000416379.6           |
|------------------------------------|-------|-----|--------|---------------------------------|-----------------------------|
| Descriptor                         | Start | End | Length | Source                          | Ref no.                     |
| Signal Peptide                     | 1     | 27  | 27     | PHOBIUS entry                   | SIGNAL_PEPTIDE (1)          |
| Signal peptide N-region            | 1     | 11  | 11     | PHOBIUS entry                   | SIGNAL_PEPTIDE_N_REGION (6) |
| SignalP-noTM                       | 1     | 28  | 28     | SIGNALP_EUK entry               | SignalP-noTM (8)            |
| Signal peptide H-region            | 12    | 22  | 11     | PHOBIUS entry                   | SIGNAL_PEPTIDE_H_REGION (2) |
| Tmhelix                            | 12    | 31  | 20     | TMHMM entry                     | Tmhelix (7)                 |
| Signal peptide C-region            | 23    | 27  | 5      | PHOBIUS entry                   | SIGNAL_PEPTIDE_C_REGION(4)  |
| PKD                                | 144   | 210 | 67     | CDD entry                       | cd00146                     |
| Ig-like_fold                       | 157   | 225 | 69     | InterPro homologous superfamily | IPR013783                   |
| Immunoglobulins                    | 157   | 225 | 69     | CATH-Gene3D                     | G3DSA:2.60.40.10            |
| PKD domain                         | 171   | 213 | 43     | SUPERFAMILY                     | SSF49299                    |
| PKD_dom_sf                         | 171   | 334 | 164    | InterPro homologous superfamily | IPR035986                   |
| PKD_dom                            | 177   | 210 | 34     | InterPro domain                 | IPR000601                   |
| PKD_dom                            | 177   | 210 | 34     | PROSITE profiles                | PS50093                     |
| PKD domain                         | 293   | 334 | 42     | SUPERFAMILY                     | SSF49299                    |
| Transmembrane region               | 340   | 362 | 23     | PHOBIUS entry                   | TRANSMEMBRANE (5)           |
| Tmhelix                            | 340   | 362 | 23     | TMHMM entry                     | Tmhelix (9)                 |
| Cytoplasmic domain                 | 363   | 435 | 73     | PHOBIUS entry                   | CYTOPLASMIC_DOMAIN (3)      |
| Non cytoplasmic domain             | 28    | 339 | 312    | PHOBIUS entry                   | NON_CYTOPLASMC_DOMAIN (10)  |
| MELANOCYTE PROTEIN PMEL 17-related | 23    | 435 | 413    | PANTHER entry                   | PTHR11861                   |
| TRANSMEMBRANE PROTEIN 130          | 23    | 435 | 413    | PANTHER entry                   | PTHR11861:SF10              |

| Human GPNMB             |       |     |        | GPNMB-215                       | ENST00000647578.1           |
|-------------------------|-------|-----|--------|---------------------------------|-----------------------------|
| Descriptor              | Start | End | Length | Source                          | Ref no.                     |
| Signal peptide N-region | 1     | 2   | 2      | PHOBIUS entry                   | SIGNAL_PEPTIDE_N_REGION (2) |
| Signal Peptide          | 1     | 21  | 21     | PHOBIUS entry                   | SIGNAL_PEPTIDE (6)          |
| SignalP-noTM            | 1     | 22  | 22     | SIGNALP_EUK entry               | SignalP-noTM (4)            |
| Signal peptide H-region | 3     | 14  | 12     | PHOBIUS entry                   | SIGNAL_PEPTIDE_H_REGION (5) |
| Signal peptide C-region | 15    | 21  | 7      | PHOBIUS entry                   | SIGNAL_PEPTIDE_C_REGION (9) |
| PKD/Chitinase_dom       | 250   | 402 | 153    | InterPro domain                 | IPR022409                   |
| PKD_9                   | 250   | 402 | 153    | SMART                           | SM00089                     |
| PKD                     | 256   | 319 | 64     | CDD entry                       | cd00146                     |
| Ig-like_fold            | 257   | 321 | 65     | InterPro homologous superfamily | IPR013783                   |
| Immunoglobulins         | 257   | 321 | 65     | CATH-Gene3D                     | G3DSA:2.60.40.10            |
| PKD_dom_sf              | 271   | 316 | 46     | InterPro homologous superfamily | IPR035986                   |
| PKD domain              | 271   | 316 | 46     | SUPERFAMILY                     | SSF49299                    |

|                                        |     |     |     |                  |                            |
|----------------------------------------|-----|-----|-----|------------------|----------------------------|
| PKD_dom                                | 277 | 319 | 43  | InterPro domain  | IPR000601                  |
| PKD                                    | 277 | 315 | 39  | PROSITE profiles | PS50093                    |
| PKD                                    | 279 | 319 | 41  | Pfam             | PF00801                    |
| Tmhelix                                | 513 | 535 | 23  | TMHMM entry      | Tmhelix (8)                |
| Transmembrane region                   | 516 | 535 | 20  | PHOBIUS entry    | TRANSMEMBRANE (7)          |
| Cytoplasmic domain                     | 536 | 588 | 53  | PHOBIUS entry    | CYTOPLASMIC_DOMAIN (3)     |
| Non cytoplasmic domain                 | 22  | 515 | 494 | PHOBIUS entry    | NON_CYTOPLASMIC_DOMAIN (1) |
| TRANSMEMBRANE<br>GLYCOPROTEIN NMB      | 1   | 583 | 583 | PANTHER entry    | PTHR11861:SF11             |
| MELANOCYTE PROTEIN PMEL 17-<br>RELATED | 1   | 583 | 583 | PANTHER entry    | PTHR11861                  |

| Human PMEL                              |       |     |        | PMEL-204                           | ENST00000548493.5              |
|-----------------------------------------|-------|-----|--------|------------------------------------|--------------------------------|
| Descriptor                              | Start | End | Length | Source                             | Ref no.                        |
| Signal peptide N-region                 | 1     | 7   | 7      | PHOBIUS entry                      | SIGNAL_PEPTIDE_N_REGION        |
| SignalP-TM                              | 1     | 22  | 22     | SIGNALP_GRAM_POSITIVE<br>entry     | SignalP-TM (10)                |
| Signal Peptide                          | 1     | 23  | 23     | PHOBIUS entry                      | SIGNAL_PEPTIDE (8)             |
| SIGNALP_EUK entry                       | 1     | 24  | 24     | SignalP_EUK entry                  | SignalP-noTM (4)               |
| Signal peptide H-region                 | 8     | 19  | 12     | PHOBIUS entry                      | SIGNAL_PEPTIDE_H               |
| Signal peptide C-region                 | 20    | 23  | 4      | PHOBIUS entry                      | SIGNAL_PEPTIDE_C_REGION<br>(9) |
| Non cytoplasmic domain                  | 24    | 595 | 572    | PHOBIUS entry                      | NON_CYTOPLASM                  |
| Ig-like_fold                            | 226   | 304 | 79     | InterPro homologous<br>superfamily | IPR013783                      |
| Immunoglobulins                         | 226   | 304 | 79     | CATH-Gene3D                        | G3DSA:2.60.40.10               |
| PKD/Chitinase_dom                       | 229   | 311 | 83     | Interpro Domain                    | IPR022409                      |
| PKD_9                                   | 229   | 311 | 83     | SMART                              | SM00089                        |
| PKD                                     | 233   | 295 | 63     | CDD entry                          | cd00146                        |
| PKD_Dom                                 | 233   | 300 | 68     | Interpro Domain                    | IPR000601                      |
| PKD                                     | 233   | 300 | 68     | Pfam                               | PF00801                        |
| PKD_dom_sf                              | 252   | 289 | 38     | InterPro homologous<br>superfamily | IPR035986                      |
| PKD domain                              | 252   | 289 | 38     | SUPERFAMILY                        | SSF49299                       |
| PKD                                     | 255   | 292 | 38     | PROSITE profiles                   | PS50093                        |
| disorder_prediction                     | 302   | 353 | 52     | MOBIDB_LITE entry                  | mobidb-lite (3)                |
| Tmhelix                                 | 593   | 615 | 23     | TMHMM entry                        | Tmhelix (7)                    |
| Transmembrane region                    | 596   | 616 | 21     | PHOBIUS entry                      | TRANSMEMBRANE                  |
| Cytoplasmic domain                      | 617   | 661 | 45     | PHOBIUS entry                      | CYTOPLASMIC_DOMAIN<br>(11)     |
| Melanocyte protein PMEL 17 -<br>related | 4     | 661 | 658    | PANTHER entry                      | PTHR11861                      |
| Melanocyte protein PMEL                 | 4     | 661 | 658    | PANTHER entry                      | PTHR11861:SF1                  |

**Table S4.** Clade-representative paralog sequences used.

|                                                     | <b>tmem130</b>                       | <b>gpnmb</b>                         | <b>pmel</b>                          |
|-----------------------------------------------------|--------------------------------------|--------------------------------------|--------------------------------------|
| Human ( <i>Homo sapiens</i> )                       | <a href="#">ENST00000416379.6</a>    | <a href="#">NP_001005340.1</a>       | <a href="#">ENST00000548493.5</a>    |
| Chicken ( <i>Gallus gallus</i> )                    | <a href="#">ENSGALT00000041067.4</a> | <a href="#">ENSGALT00000017821.6</a> | <a href="#">ENSGALG00000035350</a>   |
| Common lizard ( <i>Zootoca vivipara</i> )           | <a href="#">XP_034987520.1</a>       | <a href="#">XP_034985369.1</a>       | <a href="#">XP_034959827.1</a>       |
| Tropical clawed frog ( <i>Xenopus tropicalis</i> )  | <a href="#">XP_012826896.2</a>       | <a href="#">NP_001124514.1</a>       | <a href="#">XP_002934561.3</a>       |
| Coelacanth ( <i>Latimeria chalumnae</i> )           | <a href="#">XP_006000848.2</a>       | <a href="#">XP_005997158.1</a>       | <a href="#">XP_005986276.1</a>       |
| Zebrafish ( <i>Danio rerio</i> )                    | <a href="#">ENSDART00000169019.3</a> | <a href="#">ENSDART00000090883.6</a> | <a href="#">ENSDART00000123568.4</a> |
|                                                     |                                      |                                      | <a href="#">ENSDART00000046268.7</a> |
| Thorny skate ( <i>Amblyraja radiata</i> )           | <a href="#">XP_032896444.1</a>       | <a href="#">XP_032902250.1</a>       | <a href="#">XP_032871492.1</a>       |
| Sea lamprey ( <i>Petromyzon marinus</i> )           |                                      | <a href="#">XP_032818521.1</a>       | <a href="#">XP_032813209.1</a>       |
| Sea lamprey ( <i>Petromyzon marinus</i> )           |                                      | <a href="#">XP_032807179.1</a>       | <a href="#">XP_032831262.1</a>       |
| European starfish ( <i>Asterias rubens</i> )        | <a href="#">XP_033631068.1</a>       |                                      |                                      |
| Acorn worm ( <i>Saccoglossus kowalevskii</i> )      | <a href="#">XP_002739013.1</a>       |                                      |                                      |
| Common Spider ( <i>Parasteatoda tepidariorum</i> )  | <a href="#">XP_015915338.1</a>       |                                      |                                      |
| Cauliflower coral ( <i>Pocillopora damicornis</i> ) | <a href="#">RMX49586.1</a>           |                                      |                                      |
| Trichoplax ( <i>Trichoplax adhaerens</i> )          | <a href="#">RDD42042.1</a>           |                                      |                                      |

**Table S5.** Paralogous genes from human, chicken or thorny skate that were found neighbouring lamprey *gpnmb*, *pmel*-like, *pmel* or *gpnmb*-like.

| H. sapiens Ch 7 [GPNMB] |                 | H. sapiens Ch 12 [PMEL] |                 | G. gallus Ch 2 [gpnmb] |                   | G. gallus Ch 33 [pmel] |                   | A. radiata Ch2 [gpnmb] |             | A. radiata Ch 46 [pmel] |             |
|-------------------------|-----------------|-------------------------|-----------------|------------------------|-------------------|------------------------|-------------------|------------------------|-------------|-------------------------|-------------|
| Gene symbol             | Accession       | Gene symbol             | Accession       | Gene symbol            | Accession         | Gene symbol            | Accession         | Gene symbol            | Accession   | Gene symbol             | Accession   |
| RPA3                    | ENSG00000106399 | RACGAP1P                | ENSG00000257331 | CHPF2                  | ENSGALG0000036477 | TMBIM6                 | ENSGALG0000031426 | lec1                   | NC_045957.1 | d63                     | NC_046001.1 |
| ICA1                    | ENSG00000003147 | SLC48A1                 | ENSG00000211584 | ASB10                  | ENSGALG0000032845 | TFCP2                  | ENSGALG0000035530 | ars1                   | NC_045957.1 | fcp2                    | NC_046001.1 |
| AGMO                    | ENSG00000187546 | ASB8                    | ENSG00000177981 | FASTK                  | ENSGALG000003058  | SLC4A8                 | ENSGALG0000031274 | tqb1                   | NC_045957.1 | 4galnt1                 | NC_046001.1 |
| SOSTDC1                 | ENSG00000171243 | LMBR1L                  | ENSG00000139636 | SLC4A2                 | ENSGALG0000034284 | FAIM2                  | ENSGALG0000031615 | ard3                   | NC_045957.1 | acgap1                  | NC_046001.1 |
| ANKMY2                  | ENSG00000106524 | TUBA1A                  | ENSG00000167552 | IBA57                  | ENSGALG0000005328 | SPATS2                 | ENSGALG0000033957 | itrm1                  | NC_045957.1 | ym1                     | NC_046001.1 |
| BZW2                    | ENSG00000136261 | SPATS2                  | ENSG00000123352 | ARF1                   | ENSGALG0000005393 | MCRS1                  | ENSGALG0000035203 | dhaf3                  | NC_045957.1 | mbr1l                   | NC_046001.1 |
| AGR2                    | ENSG00000106541 | MCRS1                   | ENSG00000187778 | CCDC12                 | ENSGALG0000005487 | CD63                   | ENSGALG0000055094 | pp1r9a                 | NC_045957.1 | a2g4                    | NC_046001.1 |
| TMEM196                 | ENSG00000173452 | TMBIM6                  | ENSG00000139644 | SETD2                  | ENSGALG0000042051 | GDF11                  | ENSGALG0000036806 | et1                    | NC_045957.1 | dk2                     | NC_046001.1 |
| NUP42                   | ENSG00000136243 | TFCP2                   | ENSG00000135457 | KLHL18                 | ENSGALG0000005582 | SARNP                  | ENSGALG0000030342 | lp2                    | NC_045957.1 | mel                     | NC_046001.1 |
| GPNMB                   | ENSG00000136235 | SLC4A8                  | ENSG00000050438 | DLEC1                  | ENSGALG0000005826 | RACGAP1                | ENSGALG0000033231 | abbr2                  | NC_045957.1 | crs1                    | NC_046001.1 |
| MALSU1                  | ENSG00000156928 | MFSD5                   | ENSG00000182544 | U6                     | ENSGALG0000025663 | SLC48A1                | ENSGALG0000036380 | fx1                    | NC_045957.1 | pats2                   | NC_046001.1 |
| IGF2BP3                 | ENSG00000136231 | AAAS                    | ENSG00000094914 | CRYGN                  | ENSGALG0000006189 | ATP5F1B                | ENSGALG0000038801 | hmp5                   | NC_045957.1 | ic4a8                   | NC_046001.1 |
| CCDC126                 | ENSG00000169193 | ATF7                    | ENSG00000170653 | RHEB                   | ENSGALG0000039880 | TIMELESS               | ENSGALG0000034688 | ag1                    | NC_045957.1 | gap2                    | NC_046001.1 |
| NPY                     | ENSG00000122585 | COPZ1                   | ENSG00000111481 | GALNT11                | ENSGALG0000006233 | CS                     | ENSGALG0000030466 | trr                    | NC_045957.1 | arnp                    | NC_046001.1 |
| SNX10                   | ENSG00000086300 | CD63                    | ENSG00000135404 | NOM1                   | ENSGALG0000006437 | CDK2                   | ENSGALG0000032699 | rp44                   | NC_045957.1 | df11                    | NC_046001.1 |
| HOXA1                   | ENSG00000105991 | GDF11                   | ENSG00000135414 | LARP4B                 | ENSGALG0000006672 | PMEL                   | ENSGALG0000035350 | tx17                   | NC_045957.1 | naic14                  | NC_046001.1 |
| HOXA4                   | ENSG00000197576 | SARNP                   | ENSG00000205323 | PITRM1                 | ENSGALG0000007036 | PYM1                   | ENSGALG0000046169 | ec61b                  | NC_045957.1 | imeless                 | NC_046001.1 |
| HOXA9                   | ENSG00000078399 | DNAJC14                 | ENSG00000135392 | PARD3                  | ENSGALG0000007125 | TUBA1A                 | ENSGALG0000037953 | pa57                   | NC_045957.1 | mas-cga                 | NC_046001.1 |
| HOXA10                  | ENSG00000253293 | PYM1                    | ENSG00000170473 | ITGB1                  | ENSGALG0000007145 | LMBR1L                 | ENSGALG0000037665 | rygn                   | NC_045957.1 |                         |             |
| HOXA11                  | ENSG00000005073 | PMEL                    | ENSG00000185664 | SVIL                   | ENSGALG0000007331 | MFSD5                  | ENSGALG0000033927 | heb                    | NC_045957.1 |                         |             |
| JAZF1                   | ENSG00000153814 | CDK2                    | ENSG00000123374 | ARMC4                  | ENSGALG0000007417 | ASB8                   | ENSGALG0000037396 | alnt11                 | NC_045957.1 |                         |             |
| FKBP14                  | ENSG00000106080 | PA2G4                   | ENSG00000170515 | RAB18                  | ENSGALG0000007435 | AAAS                   | ENSGALG0000032843 | om1                    | NC_045957.1 |                         |             |

|         |                 |          |                 |         |                   |       |                   |         |             |  |  |
|---------|-----------------|----------|-----------------|---------|-------------------|-------|-------------------|---------|-------------|--|--|
| GARS1   | ENSG00000106105 | CS       | ENSG00000062485 | YME1L1  | ENSGALG0000007492 | COPZ1 | ENSGALG0000043336 | arp4b   | NC_045957.1 |  |  |
| LSM5    | ENSG00000106355 | CNPY2    | ENSG00000257727 | MASTL   | ENSGALG0000007507 |       |                   | di1     | NC_045957.1 |  |  |
| AVL9    | ENSG00000105778 | TIMELESS | ENSG00000111602 | ACBD5   | ENSGALG0000007519 |       |                   | vil     | NC_045957.1 |  |  |
| BBS9    | ENSG00000122507 | ATP5F1B  | ENSG00000110955 | ABI1    | ENSGALG0000007547 |       |                   | zw2     | NC_045957.1 |  |  |
| BMPER   | ENSG00000164619 | NDUFA4L2 | ENSG00000185633 | PDSS1   | ENSGALG0000007559 |       |                   | nkmy2   | NC_045957.1 |  |  |
| VPS41   | ENSG00000006715 | MARS1    | ENSG00000166986 | ABCB1   | ENSGALG0000008912 |       |                   | ostdc1  | NC_045957.1 |  |  |
| RALA    | ENSG00000006451 | B4GALNT1 | ENSG00000135454 | SRI     | ENSGALG0000008985 |       |                   | rppa    | NC_045957.1 |  |  |
| SUGCT   | ENSG00000175600 | AGAP2    | ENSG00000135439 | AKAP9   | ENSGALG0000040724 |       |                   | gmc     | NC_045957.1 |  |  |
| INHBA   | ENSG00000122641 | OTOGL    | ENSG00000165899 | KRIT1   | ENSGALG0000042651 |       |                   | ca1     | NC_045957.1 |  |  |
| PSMA2   | ENSG00000106588 | APAF1    | ENSG00000120868 | PEX1    | ENSGALG0000009410 |       |                   | pa3     | NC_045957.1 |  |  |
| MRPL32  | ENSG00000106591 |          |                 | BET1    | ENSGALG0000024485 |       |                   | mem196  | NC_045957.1 |  |  |
| ADCY1   | ENSG00000164742 |          |                 | PPP1R9A | ENSGALG0000009686 |       |                   | mad-guc | NC_045957.1 |  |  |
| UPP1    | ENSG00000183696 |          |                 | RPA3    | ENSGALG0000010700 |       |                   | up42    | NC_045957.1 |  |  |
| LANCL2  | ENSG00000132434 |          |                 | ICA1    | ENSGALG0000010708 |       |                   | pnmb    | NC_045957.1 |  |  |
| VOPP1   | ENSG00000154978 |          |                 | AGMO    | ENSGALG0000010792 |       |                   | alsu1   | NC_045957.1 |  |  |
| ABCB1   | ENSG00000085563 |          |                 | CRPPA   | ENSGALG0000010795 |       |                   | gf2bp3  | NC_045957.1 |  |  |
| SRI     | ENSG00000075142 |          |                 | SOSTDC1 | ENSGALG0000036836 |       |                   | cdc126  | NC_045957.1 |  |  |
| AKAP9   | ENSG00000127914 |          |                 | ANKMY2  | ENSGALG0000010804 |       |                   | py      | NC_045957.1 |  |  |
| KRIT1   | ENSG00000001631 |          |                 | BZW2    | ENSGALG0000010809 |       |                   | ex1     | NC_045957.1 |  |  |
| PEX1    | ENSG00000127980 |          |                 | AGR2    | ENSGALG0000010825 |       |                   | hrb     | NC_045957.1 |  |  |
| BET1    | ENSG00000105829 |          |                 | TMEM196 | ENSGALG0000010865 |       |                   | arb     | NC_045957.1 |  |  |
| PPP1R9A | ENSG00000158528 |          |                 | GPNMB   | ENSGALG0000010949 |       |                   | gly1    | NC_045957.1 |  |  |
| SDHAF3  | ENSG00000196636 |          |                 | MALSU1  | ENSGALG0000010954 |       |                   | ek10    | NC_045957.1 |  |  |
| MUC17   | ENSG00000169876 |          |                 | IGF2BP3 | ENSGALG0000010961 |       |                   | zi2     | NC_045957.1 |  |  |
| TPK1    | ENSG00000196511 |          |                 | CCDC126 | ENSGALG0000010976 |       |                   | kbp14   | NC_045957.1 |  |  |
| SLC4A2  | ENSG00000164889 |          |                 | NPY     | ENSGALG0000010983 |       |                   | azf1    | NC_045957.1 |  |  |

|                     |                 |  |  |         |                   |  |  |        |             |  |  |
|---------------------|-----------------|--|--|---------|-------------------|--|--|--------|-------------|--|--|
| FASTK               | ENSG00000164896 |  |  | SNX10   | ENSGALG0000011046 |  |  | oxa11  | NC_045957.1 |  |  |
| ASB10               | ENSG00000146926 |  |  | HOXA1   | ENSGALG0000028095 |  |  | oxa10  | NC_045957.1 |  |  |
| CHPF2               | ENSG00000033100 |  |  | HOXA4   | ENSGALG0000022622 |  |  | oxa9   | NC_045957.1 |  |  |
| CRYGN               | ENSG00000127377 |  |  | HOXA9   | ENSGALG0000028983 |  |  | oxa4   | NC_045957.1 |  |  |
| RHEB                | ENSG00000106615 |  |  | HOXA10  | ENSGALG0000026631 |  |  | oxa1   | NC_045957.1 |  |  |
| GALNT11             | ENSG00000178234 |  |  | HOXA11  | ENSGALG0000040021 |  |  | nx10   | NC_045957.1 |  |  |
| NOM1                | ENSG00000146909 |  |  | JAZF1   | ENSGALG0000030455 |  |  | nkh    | NC_045957.1 |  |  |
|                     |                 |  |  | FKBP14  | ENSGALG0000011181 |  |  | yco1   | NC_045957.1 |  |  |
|                     |                 |  |  | HACL1   | ENSGALG0000011211 |  |  | lipr2  | NC_045957.1 |  |  |
|                     |                 |  |  | BTD     | ENSGALG0000011216 |  |  | mem245 | NC_045957.1 |  |  |
|                     |                 |  |  | ANKRD28 | ENSGALG0000011226 |  |  | rrs1   | NC_045957.1 |  |  |
|                     |                 |  |  | GALNT15 | ENSGALG0000011235 |  |  | dcy1   | NC_045957.1 |  |  |
|                     |                 |  |  | OXNAD1  | ENSGALG0000011239 |  |  | pk1    | NC_045957.1 |  |  |
| Syntaneous w/ gpnmb |                 |  |  | TBC1D5  | ENSGALG0000011251 |  |  | anci2  | NC_045957.1 |  |  |
| Syntaneous w/ pmel  |                 |  |  | KCNH8   | ENSGALG0000011262 |  |  | opp1   | NC_045957.1 |  |  |
|                     |                 |  |  | KAT2B   | ENSGALG0000011278 |  |  | acl1   | NC_045957.1 |  |  |
|                     |                 |  |  | SGO1    | ENSGALG0000011281 |  |  | td     | NC_045957.1 |  |  |
|                     |                 |  |  | THRB    | ENSGALG0000011294 |  |  | nkrd28 | NC_045957.1 |  |  |
|                     |                 |  |  | RARB    | ENSGALG0000011298 |  |  | alnt15 | NC_045957.1 |  |  |
|                     |                 |  |  | NGLY1   | ENSGALG0000011304 |  |  | xnad1  | NC_045957.1 |  |  |
|                     |                 |  |  | NEK10   | ENSGALG0000011322 |  |  | bc1d5  | NC_045957.1 |  |  |
|                     |                 |  |  | AZ12    | ENSGALG0000011428 |  |  | cnh8   | NC_045957.1 |  |  |
|                     |                 |  |  | DNAJC13 | ENSGALG0000035068 |  |  | at2b   | NC_045957.1 |  |  |
|                     |                 |  |  | ACKR4   | ENSGALG0000041491 |  |  | go1    | NC_045957.1 |  |  |
|                     |                 |  |  | TMEM108 | ENSGALG0000036412 |  |  | bitram | NC_045957.1 |  |  |
|                     |                 |  |  | FYCO1   | ENSGALG0000040212 |  |  | rit1   | NC_045957.1 |  |  |



|  |  |  |  |         |                   |  |  |         |             |  |  |
|--|--|--|--|---------|-------------------|--|--|---------|-------------|--|--|
|  |  |  |  | LZTFL1  | ENSGALG0000054523 |  |  | kap9    | NC_045957.1 |  |  |
|  |  |  |  | CLASP2  | ENSGALG0000032647 |  |  | ri      | NC_045957.1 |  |  |
|  |  |  |  | ARPP21  | ENSGALG0000043240 |  |  | ckr4    | NC_045957.1 |  |  |
|  |  |  |  | BMPER   | ENSGALG0000029811 |  |  | najc13  | NC_045957.1 |  |  |
|  |  |  |  | BBS9    | ENSGALG0000031650 |  |  | ztf1    | NC_045957.1 |  |  |
|  |  |  |  | AVL9    | ENSGALG0000041568 |  |  | yo10    | NC_045957.1 |  |  |
|  |  |  |  | LSM5    | ENSGALG0000041625 |  |  | nf622   | NC_045957.1 |  |  |
|  |  |  |  | VPS41   | ENSGALG0000031635 |  |  | mem108  | NC_045957.1 |  |  |
|  |  |  |  | RALA    | ENSGALG0000031893 |  |  | bx17    | NC_045957.1 |  |  |
|  |  |  |  | SUGCT   | ENSGALG0000031758 |  |  | mag-gcc | NC_045957.1 |  |  |
|  |  |  |  | INHBA   | ENSGALG0000034616 |  |  | dss1    | NC_045957.1 |  |  |
|  |  |  |  | PSMA2   | ENSGALG0000039387 |  |  | bi1     | NC_045957.1 |  |  |
|  |  |  |  | MRPL32  | ENSGALG0000037258 |  |  | cbd5    | NC_045957.1 |  |  |
|  |  |  |  | VOPP1   | ENSGALG0000042773 |  |  | astl    | NC_045957.1 |  |  |
|  |  |  |  | LANCL2  | ENSGALG0000032570 |  |  | me111   | NC_045957.1 |  |  |
|  |  |  |  | TPK1    | ENSGALG0000040298 |  |  | rmc4    | NC_045957.1 |  |  |
|  |  |  |  | ADCY1   | ENSGALG0000031170 |  |  | sma2    | NC_045957.1 |  |  |
|  |  |  |  | NFX1    | ENSGALG0000043724 |  |  | rpl32   | NC_045957.1 |  |  |
|  |  |  |  | RECK    | ENSGALG0000036829 |  |  |         |             |  |  |
|  |  |  |  | ZNF622  | ENSGALG0000037171 |  |  |         |             |  |  |
|  |  |  |  | FBXL7   | ENSGALG0000031947 |  |  |         |             |  |  |
|  |  |  |  | ANKH    | ENSGALG0000012964 |  |  |         |             |  |  |
|  |  |  |  | MTRR    | ENSGALG0000039424 |  |  |         |             |  |  |
|  |  |  |  | UPP1    | ENSGALG0000013073 |  |  |         |             |  |  |
|  |  |  |  | TMEM245 | ENSGALG0000013138 |  |  |         |             |  |  |
|  |  |  |  | FRRS1L  | ENSGALG0000025792 |  |  |         |             |  |  |

|  |  |  |  |        |                        |  |  |  |  |  |  |
|--|--|--|--|--------|------------------------|--|--|--|--|--|--|
|  |  |  |  | BAG1   | ENSGALG0<br>0000013157 |  |  |  |  |  |  |
|  |  |  |  | CHMP5  | ENSGALG0<br>0000013160 |  |  |  |  |  |  |
|  |  |  |  | GABBR2 | ENSGALG0<br>0000013200 |  |  |  |  |  |  |
|  |  |  |  | ELP2   | ENSGALG0<br>0000039034 |  |  |  |  |  |  |
|  |  |  |  | ERP44  | ENSGALG0<br>0000013452 |  |  |  |  |  |  |
|  |  |  |  | STX17  | ENSGALG0<br>0000013462 |  |  |  |  |  |  |
|  |  |  |  | SEC61B | ENSGALG0<br>0000013569 |  |  |  |  |  |  |
|  |  |  |  | GLIPR2 | ENSGALG0<br>0000028821 |  |  |  |  |  |  |
|  |  |  |  | MOS    | ENSGALG0<br>0000042082 |  |  |  |  |  |  |

**Table S6.** Additional PMEL paralog sequences used for RPT domain predictions.

| <i><b>Supplemental Figures</b></i>                                     |                                      |
|------------------------------------------------------------------------|--------------------------------------|
| Agassiz's desert tortoise ( <i>Gopherus agassizii</i> )                | <a href="#">ENSGAGT00000005719.1</a> |
| Atlantic herring ( <i>Clupea harengus</i> )                            | <a href="#">ENSCHAT00000043664.1</a> |
| Barn Owl ( <i>Tyto alba</i> )                                          | <a href="#">AUD07748.1</a>           |
| Barred-Tailed Pigeon ( <i>Patagioenas fasciata monilis</i> )           | <a href="#">OPJ72592.1</a>           |
| Blind Cavefish ( <i>Astyanax fasciatus mexicanus</i> )                 | <a href="#">A0A4W6F2T7</a>           |
| Blunt snouted clingfish ( <i>Gouania willdenowi</i> )                  | <a href="#">ENSGWIT00000010238.1</a> |
| Brown Trout ( <i>Salmo trutta</i> )                                    | <a href="#">ENSSTUT00000048284.1</a> |
| Central Bearded Dragon ( <i>Pogona vitticeps</i> )                     | <a href="#">XP_020638533.1</a>       |
| Cod ( <i>Gadus morhua</i> )                                            | <a href="#">ENSGMOT00000001759.1</a> |
| Cow ( <i>Bos taurus</i> )                                              | <a href="#">NP_001073684.2</a>       |
| Dog ( <i>Canis lupus familiaris</i> )                                  | <a href="#">NP_001096686.1</a>       |
| Electric Eel ( <i>Electrophorus electricus</i> )                       | <a href="#">XP_026888855.1</a>       |
| European Rabbit ( <i>Oryctolagus cuniculus</i> )                       | <a href="#">CCA62427.1</a>           |
| Gaboon caecilian ( <i>Geotrypetes seraphini</i> )                      | <a href="#">XP_033793418.1</a>       |
| Great blue-spotted mudskipper ( <i>Boleophthalmus pectinirostris</i> ) | <a href="#">XP_020792628.1</a>       |
| Greater Horseshoe Bat ( <i>Rhinolophus ferrumequinum</i> )             | <a href="#">XP_032972790.1</a>       |
| Horse ( <i>Equus caballus</i> )                                        | <a href="#">NP_001157361.1</a>       |
| Japanese quail ( <i>Coturnix japonica</i> )                            | <a href="#">XP_032296948.1</a>       |
| Lesser hedgehog tenrec ( <i>Echinops telfairi</i> )                    | <a href="#">XP_004700634.2</a>       |
| Mouse ( <i>Mus musculus</i> )                                          | <a href="#">NP_068682.2</a>          |
| Okarito brown kiwi ( <i>Apteryx rowi</i> )                             | <a href="#">XP_025911704.1</a>       |
| Owl Parrot ( <i>Strigops habroptila</i> )                              | <a href="#">XP_030366358.1</a>       |
| Pachon Cavefish ( <i>Astyanax Mexicanus Pachon</i> )                   | <a href="#">ENSAMXT00005031725.1</a> |
| Platypus ( <i>Ornithorhynchus anatinus</i> )                           | <a href="#">XP_028928770.1</a>       |
| Sperm Whale ( <i>Physeter catodon</i> )                                | <a href="#">XP_007129391.2</a>       |
| Tasmanian devil ( <i>Sarcophilus harrisii</i> )                        | <a href="#">XP_031797073.1</a>       |
| Tongue Sole ( <i>Cynoglossus semilaevis</i> )                          | <a href="#">XP_024915820.1</a>       |
| Tufted Duck ( <i>Aythya fuligula</i> )                                 | <a href="#">XP_032060670.1</a>       |
| Two-lined caecilian ( <i>Rhinatrema bivittatum</i> )                   | <a href="#">XP_029450632.1</a>       |

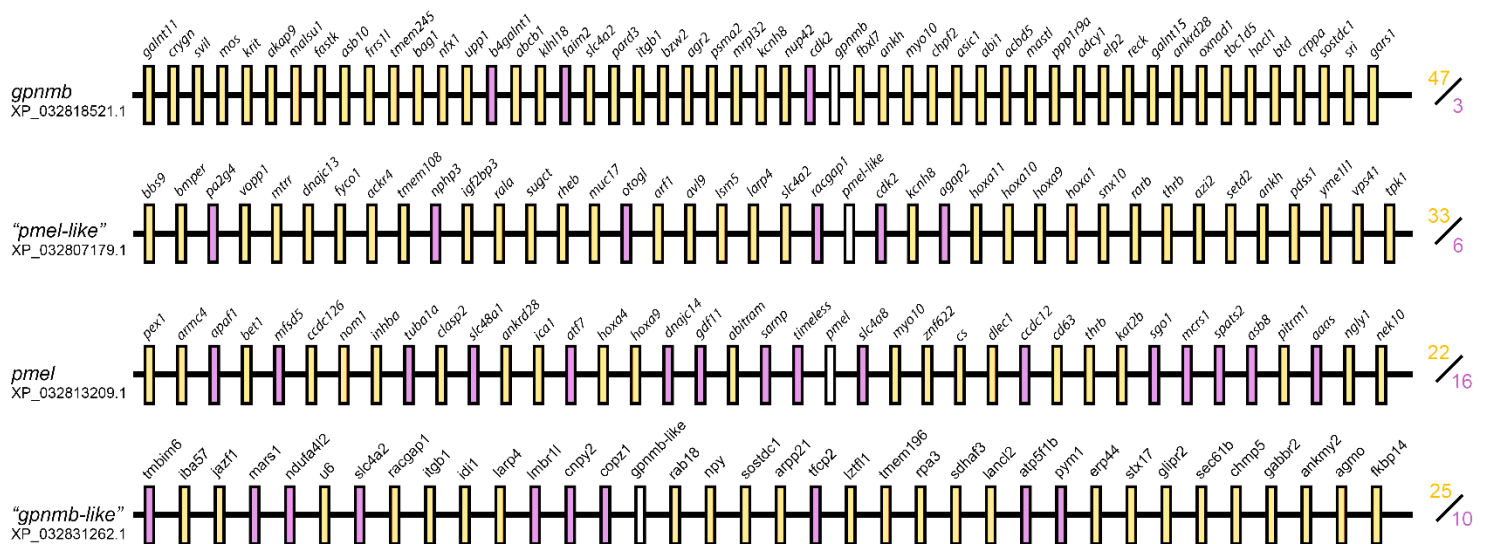

**Figure S1.** Gene synteny analysis of *pmel* and *gpnmb* in paralogs in lamprey. Schematic representation of lamprey genes neighbouring *pmel*, *pmel-like*, *gpnmb*, and *gpnmb-link* that have a paralogous gene in human, chicken or thorny skate. Genes that are paralogous to GPNMB in human, chicken and thorny skate are in yellow. Genes that are paralogous to PMEL in human, chicken and thorny skate are in purple.

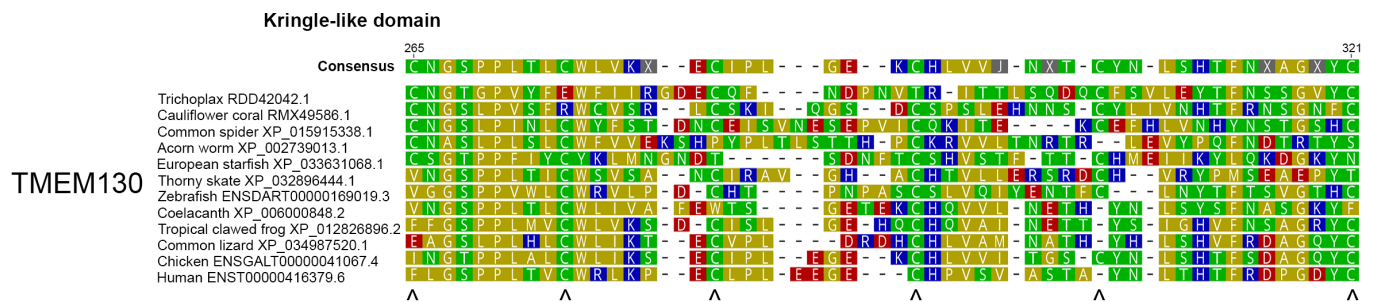

**Figure S2.** Clade representative alignments of the *tmem130* KLD. Sequence alignment of clade representative *TMEM130* proteins demonstrating the conservation, but not perfect identity, of the 6 cysteine residues (caret).

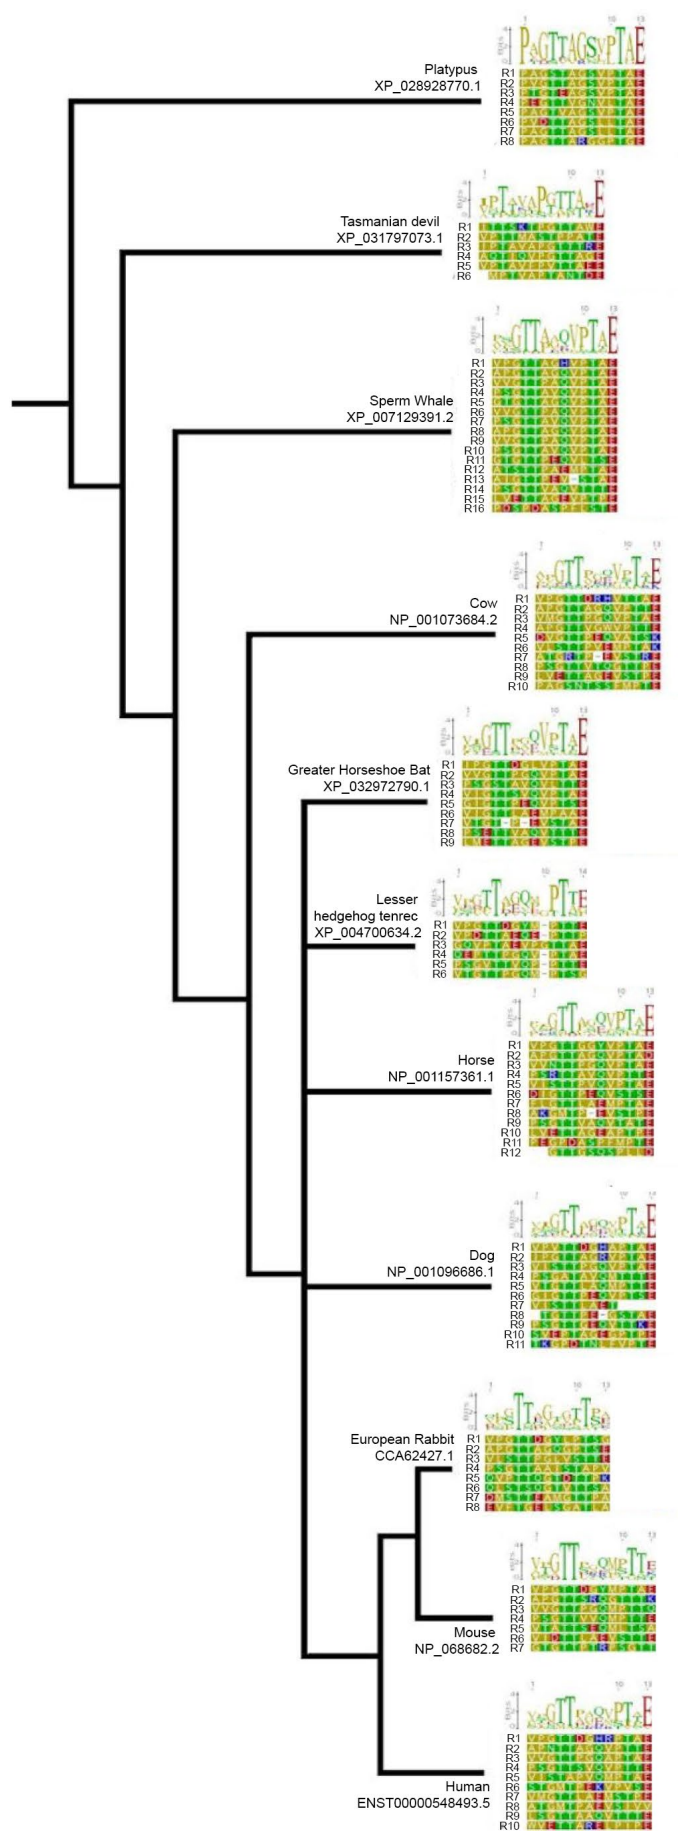

**Figure S3.** Cladogram of mammalian RPT domains. Mammalian species were selected from the following orders: Monotremata, Afrosoricida, Dasyuromorphia, Cetacea, Lagomorpha, Diprotodontia, Carnivora, Artiodactyla, Rodentia, and Primates. Amino acids are color-coded according to polarity (yellow, non-polar; green, uncharged polar; red, acidic; blue, basic).

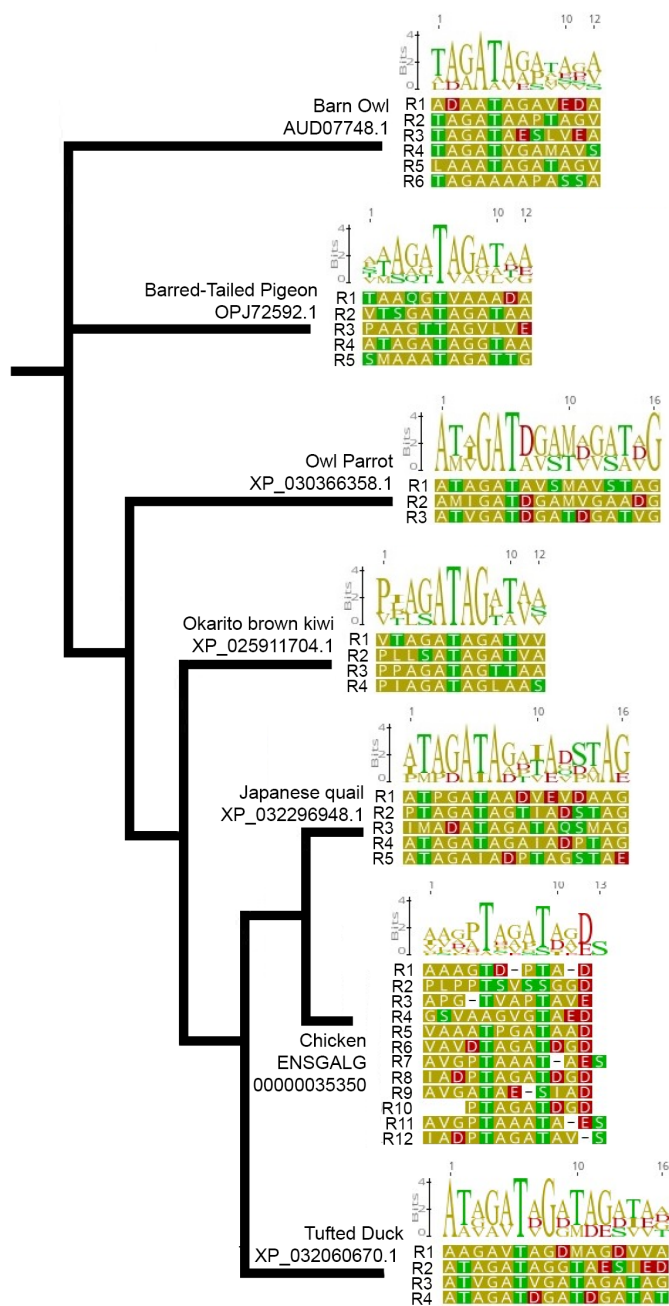

**Figure S4.** Cladogram showing Avian species Pmel RPT domains. Avian species were selected from the following orders: Struthioniformes, Galliformes, Anseriformes, Psittaciformes, Strigiformes, and Columbiformes. Amino acids are color-coded according to polarity (yellow, non-polar; green, uncharged polar; red, acidic; blue, basic).

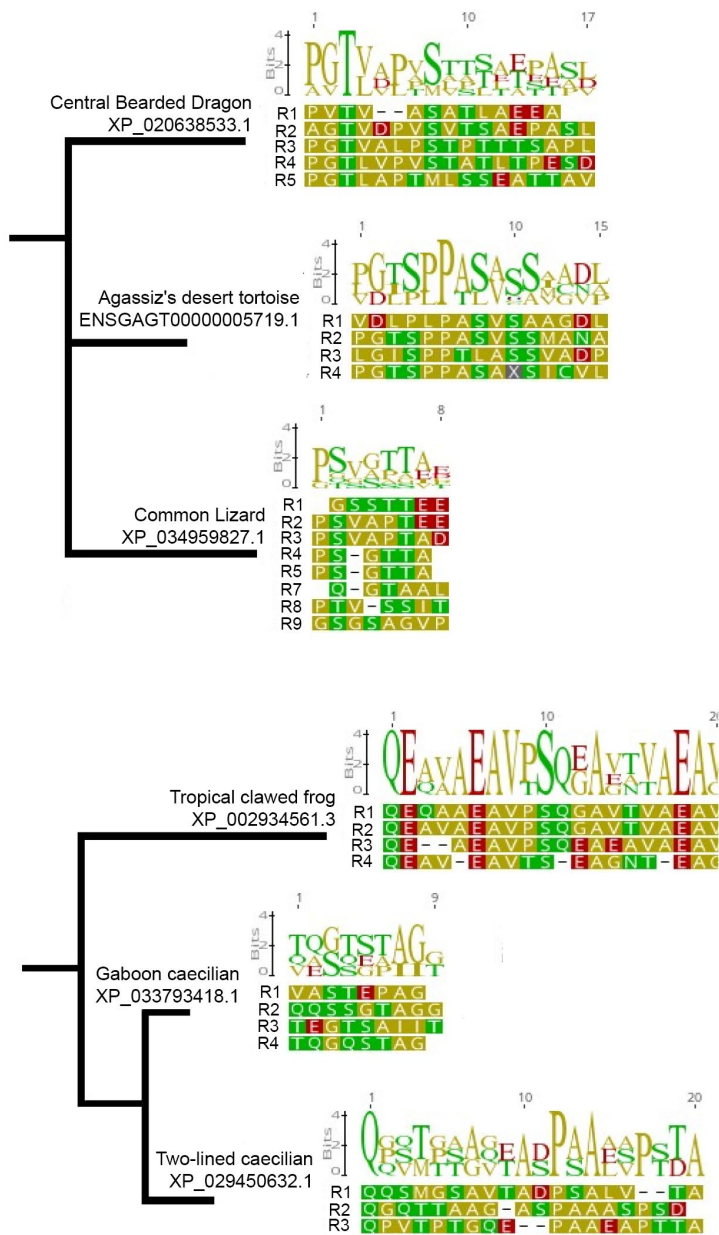

**Figure S5.** Cladogram showing the Amphibians and Reptiles Pmel RPT domains. A) Reptiles were selected from the following orders Testudines, Squamata. B) Amphibians were selected from the orders Anura and Gymnophiona. Amino acids are color-coded according to polarity (yellow, non-polar; green, uncharged polar; red, acidic; blue, basic).

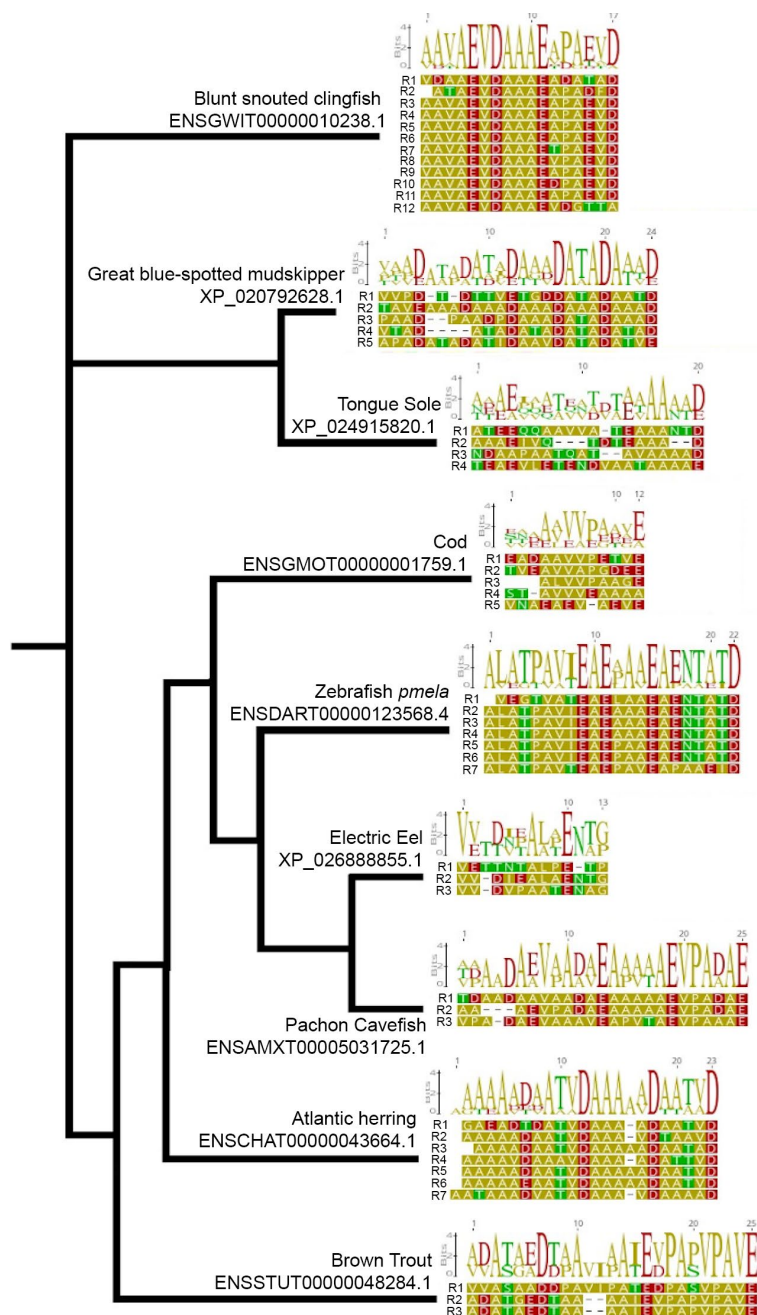

**Figure S6.** Cladogram showing the fishes Pmel RPT domain. Within the Teleostei class species were selected from the following orders Salmoniformes, Clupeiformes, Characiformes, Gadiformes, Pleuronectiformes, Perciformes, Gymnotiformes, Cypriniformes. Amino acids are color-coded according to polarity (yellow, non-polar; green, uncharged polar; red, acidic; blue, basic).
